# Supplementary material for: Predictors of 30-day Readmissions Post-CAR-T in Patients with Relapsed/Refractory Multiple Myeloma using the United States Nationwide Readmission Database
Source: Research Square preprint supplement (doi:10.21203/rs.3.rs-8571194/v1), 2026-01-22
Supplement: Supplementary file 1 [file 3caac1c559042cc87f99bb1a.docx]

**Supplementary** **Table 1**

| Disease | ICD10 code- Diagnosis/Procedure codes |
| --- | --- |
| RRMM | C90x |
| Idecabtagene Vicleucel (Ide-cel) | XW033K7, XW043K7 |
| Cilta cell- MM | XW033A7, XW043A7 |
| Hypogammaglobulinemia | D801, D802, D803, D804, D808, D809 |
| Thrombocytopenia | D69* |
| ICANS | G9201, G9202, G9203, G9204, G9205 |
| CRS | D89831, D89832, D89833, D89834, D89835, D89839 |
| HLH | D76* |
| BMT (Transplant) | Z9481, Z9484 |
| C. difficile infection | A047* |
| PCP (Pneumocystis) | B59* |
| CMV Infection | B25* |
| Sepsis (broad) | A19, A20, A21, A22, A23, A24, A25, A26, A27, A28, A29, A30, A31, A32, A33, A34, A35, A36, A440, A49, A548, A692, A75, A76, A77, A78, A79, B007, B009, B018, B019, B027, B028, B029, B058, B059, B349, B38, B39, B40, B41, B42, B43, B44, B45, B46, B47, B48, B49, B50, B51, B52, B53, B54, B55, B56, B57, B58, B59, B60, B61, B62, B63, B64, R50, T793, T813, T814, T815, T816, T836, T838, T845, T846, T847, T857, T880, Y95 |
| Sepsis (specific) | A40*, A41*, A48*, A49* |
| Dementia/encephalopathy | F01*, F02*, F03*, F04*, F05*, F061, F068, G132, G138, G30*, G310*, G311, G312, G914, G94, R4181, R54 |
| Hypertension (HTN) | I10 |
| Ischemic Stroke | I63* |
| Hemorrhagic Stroke | I61*, I62*, I60* |
| Liver Disease | K70*, Q898, Q446, I820, R160, K7460, K710, K711, K7110, K7111, K712, K713, K714, K715, K7150, K7151, K716, K717, K718, K719, K760, K761, K762, K763, K764, K765, K766, K767, K768, K7681, K7689, K769 |
| Protein-energy malnutrition (PEM) | E45, E46, E42, E43, E440, E44, E441 |
| CKD | N189 |
| CHF | I0981, I50* |
| Diabetes (DM2) | E11*, E10* |
| Coronary Disease (CAD) | I25* |
| Smoking history | Z87891, F17200, F17201, F17203, F17208, F17209, F17210, F17211, F17213, F17218, F17219, F17220, F17221, F17223, F17228, F17229, F17290, F17291, F17293, F17298, F17299, Z720 |
| Atrial fibrillation | I0981, I48* |
| Chronic antiplatelet | Z7902, Z7982 |
| Obesity | E66 |
| AKI | N17 |
| Septic shock | R6521 |
| Procedures |  |
| Transfuse | 3024x |
| Mechanical Ventilation | 5A1935Z, 5A1945Z, 5A1955Z |
| Central Line | 05HM33Z, 05HN33Z, 05H533Z, 02HV33Z, 05H633Z |
| Tocilizumab procedure | XW043H5, XW033H5 |
